# Supplementary material for: Bdf1 Bromodomains Are Essential for Meiosis and the Expression of Meiotic-Specific Genes
Source: PubMed Central journal article supplement (PMC5261807; doi:10.1371/journal.pgen.1006541), 2017-01-09
Supplement: pgen.1006541.s009.pdf [file pgen.1006541.s009.pdf]

**Table S2. List of yeast strains.** They are listed by order of appearance in the manuscript.

| Name   | Description             | Genotype                                                                                                                                      | Background     | Source          |
|--------|-------------------------|-----------------------------------------------------------------------------------------------------------------------------------------------|----------------|-----------------|
| yJG373 | <i>BDF1::TRP1</i>       | MATa/alpha leu2::hisG/" trp1::hisG/" lys2-SK1/" his4- N/his4-G ura3-SK1/" ho::LYS2/" <i>BDF1::TRP1</i> "                                      | SK1            | This study      |
| yJG387 | <i>bdf1-bd1Δ</i>        | MATa/alpha leu2::hisG/" trp1::hisG/" lys2-SK1/" his4- N/his4-G ura3-SK1/" ho::LYS2/" <i>bdf1-bd1Δ::TRP1(591-827 deleted)</i> "                | SK1            | This study      |
| yJG389 | <i>bdf1-bd2Δ</i>        | MATa/alpha leu2::hisG/" trp1::hisG/" lys2-SK1/" his4- N/his4-G ura3-SK1/" ho::LYS2/" <i>bdf1-bd2Δ::TRP1(855-1091 deleted)</i> "               | SK1            | This study      |
| yJG372 | <i>bdf1-bd1Δ-bd2Δ</i>   | MATa/alpha leu2::hisG/" trp1::hisG/" lys2-SK1/" his4- N/his4-G ura3-SK1/" ho::LYS2/" <i>bdf1-bd1Δ-bd2Δ::TRP1(591-827, 855-1091 deleted)</i> " | SK1            | This study      |
| yJG341 | <i>bdf1-Y187F</i>       | MATa/alpha leu2::hisG/" trp1::hisG/" lys2-SK1/" his4- N/his4-G ura3-SK1/" ho::LYS2/" <i>bdf1-Y187F::TRP1</i> "                                | SK1            | This study      |
| yJG342 | <i>bdf1-Y354F</i>       | MATa/alpha leu2::hisG/" trp1::hisG/" lys2-SK1/" his4- N/his4-G ura3-SK1/" ho::LYS2/" <i>bdf1-Y354F::TRP1</i> "                                | SK1            | This study      |
| yJG349 | <i>bdf1-Y187F-Y354F</i> | MATa/alpha leu2::hisG/" trp1::hisG/" lys2-SK1/" his4- N/his4-G ura3-SK1/" ho::LYS2/" <i>bdf1-Y187F-Y354F::TRP1</i> "                          | SK1            | This study      |
| yJG178 | WT                      | MATa ura3 leu2::hisG trp1::hisG lys2 ho::LYS2 met4-445 <i>his3Δ</i>                                                                           | SK1            | Ed Winter       |
| yJG302 | Bdf1-TAP                | MATa ura3 leu2::hisG trp1::hisG lys2 ho::LYS2 met4-445 <i>his3Δ BDF1-TAP::HIS3MX6</i>                                                         | SK1            | This study      |
| yJG306 | Bdf2-TAP                | MATa ura3 leu2::hisG trp1::hisG lys2 ho::LYS2 met4-445 <i>his3Δ BDF2-TAP::HIS3MX6</i>                                                         | SK1            | This study      |
| yJG360 | Bdf1-TAP <i>bdf2Δ</i>   | MATa ura3 leu2::hisG trp1::hisG lys2 ho::LYS2 met4-445 <i>his3Δ BDF1-TAP::HIS3MX6 bdf2Δ::KANMX4</i>                                           | SK1            | This study      |
| yJG408 | Bdf2-TAP <i>bdf1Δ</i>   | MATa ura3-SK1 leu2::hisG trp1::hisG lys2 ho::LYS2 met4-445 <i>his3Δ BDF2-TAP::HIS3MX6 bdf1Δ::KANMX4</i>                                       | SK1            | This study      |
| yJG122 | WT                      | MATa his3Δ1 leu2Δ0 met15Δ0 ura3Δ0                                                                                                             | BY4741 (s288c) | Open Biosystems |
| yJG300 | Bdf1-TAP                | MATa his3Δ1 leu2Δ0 met15Δ0 ura3Δ0 <i>BDF1-TAP::HIS3MX6</i>                                                                                    | BY4741         | Open Biosystems |
| yJG407 | Swr1-TAP                | MATa his3Δ1 leu2Δ0 met15Δ0 ura3Δ0 <i>SWR1-TAP::HIS3MX6</i>                                                                                    | BY4741         | Open Biosystems |
| yJG336 | Bdf1-TAP <i>yaf9Δ</i>   | MATa his3Δ1 leu2Δ0 met15Δ0 ura3Δ0 <i>BDF1-TAP::HIS3MX6 yaf9::KANMX4</i>                                                                       | BY4741         | This study      |
| yJG156 | <i>bdf1Δ</i>            | MATa/alpha leu2::hisG/" trp1::hisG/" lys2-SK1/" his4- N/his4-G ura3-SK1/" ho::LYS2/" <i>bdf1::KANMX4</i> "                                    | SK1            | This study      |
| yJG391 | <i>bdf2Δ</i>            | MATa/alpha leu2::hisG/" trp1::hisG/" lys2-SK1/" his4- N/his4-G ura3-SK1/" ho::LYS2/" <i>bdf2::KANMX4</i> "                                    | SK1            | This study      |

|        |                                                     |                                                                                                                                                             |     |                      |
|--------|-----------------------------------------------------|-------------------------------------------------------------------------------------------------------------------------------------------------------------|-----|----------------------|
| yJG426 | <i>yaf9</i> Δ                                       | MATa/alpha leu2::hisG/" trp1::hisG/" lys2-SK1/" his4- N/his4-G ura3-SK1/" ho::LYS2/"<br><i>yaf9::KANMX4</i>                                                 | SK1 | This study           |
| yJG427 | <i>swr1</i> Δ                                       | MATa/alpha leu2::hisG/" trp1::hisG/" lys2-SK1/" his4- N/his4-G ura3-SK1/" ho::LYS2/"<br><i>swr1::KANMX4</i>                                                 | SK1 | This study           |
| yJG441 | <i>bdf2-bd1</i> Δ-<br><i>bd2</i> Δ-TAP              | MATa/alpha ura3-SK1/" leu2::hisG/" trp1::hisG/" lys2/" ho::LYS2/" met4-445/" <i>his3</i> Δ/"<br><i>bdf2-BD1</i> Δ- <i>BD2</i> Δ-TAP::HIS3/"                 | SK1 | This study           |
| yJG442 | <i>bdf2-ET</i> Δ-<br>TAP                            | MATa/alpha ura3-SK1/" leu2::hisG/" trp1::hisG/" lys2/" ho::LYS2/" met4-445/" <i>his3</i> Δ/"<br><i>bdf2-ET</i> Δ-TAP::HIS3                                  | SK1 | This study           |
| yJG438 | <i>bdf1-ET</i> Δ                                    | MATa/alpha leu2::hisG/" trp1::hisG/" lys2-SK1/" his4- N/his4-G ura3-SK1/" ho::LYS2/"<br><i>bdf1-ET</i> Δ::TRP1                                              | SK1 | This study           |
| yJG529 | ER <i>bdf1-</i><br><i>Y187F-</i><br><i>Y535F</i>    | MATa/alpha leu2::hisG/" trp1::hisG/" lys2-SK1/" his4 ura3-SK1/" ho::LYS2/" pGPD1-<br>GAL4(848).ER::URA3/" GAL-NDT80::TRP1/" <i>bdf1-Y187F-Y535F::TRP1</i> " | SK1 | This study           |
| yJG530 | ER<br><i>BDF1::TRP1</i>                             | MATa/alpha leu2::hisG/" trp1::hisG/" lys2-SK1/" his4 ura3-SK1/" ho::LYS2/" pGPD1-<br>GAL4(848).ER::URA3/" GAL-NDT80::TRP1/" <i>BDF1::TRP1</i> "             | SK1 | This study           |
| yJG535 | <i>bdf1-Y187F-</i><br><i>Y354F-HA</i>               | MATa/alpha leu2::hisG/" trp1::hisG/" lys2-SK1/" his4- N/his4-G ura3-SK1/" ho::LYS2/"<br><i>bdf1-Y187F-Y354F-HA::KANMX4</i> "                                | SK1 | This study           |
| yJG536 | Bdf1-HA                                             | MATa/alpha leu2::hisG/" trp1::hisG/" lys2-SK1/" his4- N/his4-G ura3-SK1/" ho::LYS2/"<br><i>BDF1-HA::KANMX4</i> "                                            | SK1 | This study           |
| yJG521 | <i>BDF1::TRP1</i><br><i>sum1</i> Δ                  | MATa/alpha leu2::hisG/" trp1::hisG/" lys2-SK1/" his4- N/his4-G ura3-SK1/" ho::LYS2/"<br><i>sum1</i> Δ::KANMX4/ <i>BDF1::TRP1</i> "                          | SK1 | This study           |
| yJG522 | <i>bdf1-Y187F-</i><br><i>Y354F</i><br><i>sum1</i> Δ | MATa/alpha leu2::hisG/" trp1::hisG/" lys2-SK1/" his4- N/his4-G ura3-SK1/" ho::LYS2/"<br><i>sum1</i> Δ::KANMX4/" <i>bdf1-Y187F-Y354F::TRP1</i> "             | SK1 | This study           |
| yJG523 | <i>BDF1::TRP1</i><br><i>hst1</i> Δ                  | MATa/alpha leu2::hisG/" trp1::hisG/" lys2-SK1/" his4- N/his4-G ura3-SK1/" ho::LYS2/"<br><i>hst1</i> Δ::KANMX4/" <i>BDF1::TRP1</i> "                         | SK1 | This study           |
| yJG524 | <i>bdf1-Y187F-</i><br><i>Y354F hst1</i> Δ           | MATa/alpha leu2::hisG/" trp1::hisG/" lys2-SK1/" his4- N/his4-G ura3-SK1/" ho::LYS2/"<br><i>hst1</i> Δ::KANMX4/" <i>bdf1-Y187F-Y354F::TRP1</i> "             | SK1 | This study           |
| yJG493 | <i>sum1</i> Δ                                       | MATa/alpha leu2::hisG/" trp1::hisG/" lys2-SK1/" his4- N/his4-G ura3-SK1/" ho::LYS2/"<br><i>sum1</i> Δ::KANMX4/"                                             | SK1 | Ed Winter<br>(ALY50) |
| yJG496 | <i>hst1</i> Δ                                       | MATa/alpha leu2::hisG/" trp1::hisG/" lys2-SK1/" his4- N/his4-G ura3-SK1/" ho::LYS2/"<br><i>hst1</i> Δ::KANMX4/"                                             | SK1 | Ed Winter<br>(ALY27) |
