# Supplementary material for: Bdf1 Bromodomains Are Essential for Meiosis and the Expression of Meiotic-Specific Genes
Source: PubMed Central journal article supplement (PMC5261807; doi:10.1371/journal.pgen.1006541), 2017-01-09
Supplement: pgen.1006541.s010.pdf [file pgen.1006541.s010.pdf]

**Table S3. List of plasmids.**

| <b>Name</b> | <b>Description</b>                 | <b>Backbone</b> | <b>Source</b> |
|-------------|------------------------------------|-----------------|---------------|
| pJG75       | GST Sc Bdf1 Bd1 (residues 132-263) | pGEX4t1         | This study    |
| pJG76       | GST Sc Bfd1 Bd2 (residues 317-430) | pGEX4t1         | This study    |
| pJG77       | GST Bdf1 Bd1-Y187F                 | pJG75           | This study    |
| pJG78       | GST Bdf1 Bd2-Y354F                 | pJG76           | This study    |
| pJG96       | GST Brd4 Bd1 (residues 22-204)     | pGEX4t1         | This study    |
| pJG109      | GST Bdf1 Bd2-Y338W                 | pJG76           | This study    |
