# Supplementary material for: Bdf1 Bromodomains Are Essential for Meiosis and the Expression of Meiotic-Specific Genes
Source: PubMed Central journal article supplement (PMC5261807; doi:10.1371/journal.pgen.1006541), 2017-01-09
Supplement: pgen.1006541.s011.pdf [file pgen.1006541.s011.pdf]

**Table S4. List of primers.**

| <b>Name</b> | <b>Usage</b> | <b>Description</b> | <b>Sequence</b>                | <b>Source</b>             |
|-------------|--------------|--------------------|--------------------------------|---------------------------|
| prJG247     | RT-qPCR      | <i>IME1</i> ORF R  | TTATAGATGAACCTCAGGTGCCCTCC     | Govin et al, 2010 NAR     |
| prJG248     | RT-qPCR      | <i>IME1</i> ORF F  | GGTGGTGATTTTTCAACGTGGAAGGC     | Govin et al, 2010 NAR     |
| prJG249     | RT-qPCR      | <i>IME2</i> ORF F  | CAAGCATTGATTTTTGCAGGTATAA      | Govin et al, 2010 NAR     |
| prJG250     | RT-qPCR      | <i>IME2</i> ORF R  | CTGCGGGCAATTTTGTTGA            | Govin et al, 2010 NAR     |
| prJG605     | RT-qPCR      | <i>NDT80</i> ORF F | GGAAGAGGATACGCCTGTTATC         | This study                |
| prJG606     | RT-qPCR      | <i>NDT80</i> ORF R | GAGGTCCCCTTTGAACTGTAG          | This study                |
| prJG253     | RT-qPCR      | <i>DIT2</i> ORF F  | TCGTCAAAATGTTGGAGCCC           | Govin et al, 2010 NAR     |
| prJG254     | RT-qPCR      | <i>DIT2</i> ORF R  | TTGGAGAACTACAGAAATGCTGTG       | Govin et al, 2010 NAR     |
| prJG578     | RT-qPCR      | <i>SMK1</i> ORF F  | CCAACCAACCGTATAGTAAGTCCGTAG    | This study                |
| prJG579     | RT-qPCR      | <i>SMK1</i> ORF R  | CGAGCATAGAATTCTGCAAGAATGCACC   | This study                |
| prJG580     | RT-qPCR      | <i>SSP1</i> ORF F  | AAAAGTACGCAAAGCAAGGGA          | This study                |
| prJG581     | RT-qPCR      | <i>SSP1</i> ORF R  | CAGTATCTTCATGCTTTTCGCCT        | This study                |
| prJG251     | RT-qPCR      | <i>NUP85</i> ORF F | CAGCAAAGAGTTTTCTGCATACGTATCAGG | Govin et al, 2010 NAR     |
| prJG252     | RT-qPCR      | <i>NUP85</i> ORF R | ATTAACACTCTGTCATCACCTAAATCACGG | Govin et al, 2010 NAR     |
| prJG883     | qPCR-ChIP    | <i>IME1</i> PR F   | TGCTTCCCTTGTAGTTCGGTA          | This study                |
| prJG884     | qPCR-ChIP    | <i>IME1</i> PR R   | ATCTTTAACAATACTACTGGTCGATTT    | This study                |
| prJG881     | qPCR-ChIP    | <i>IME2</i> PR F   | TTTTCCAATATCACTCAACGAGAA       | This study                |
| prJG882     | qPCR-ChIP    | <i>IME2</i> PR R   | ACAGCCACCTTAACCGACTG           | This study                |
| prJG877     | qPCR-ChIP    | <i>AMA1</i> PR F   | GCGTCAATGCCTCTATGTCA           | This study                |
| prJG879     | qPCR-ChIP    | <i>AMA1</i> PR R   | TCCAAGGATTAAGTGTCTTTGAG        | This study                |
| prJG879     | qPCR-ChIP    | <i>NDT80</i> PR F  | TACTTCCGCGGCTATTTGAC           | This study                |
| prJG880     | qPCR-ChIP    | <i>NDT80</i> PR R  | CAACCGTTCTGGAGCTTTGT           | This study                |
| prJG58      | qPCR-ChIP    | <i>IME2</i> ORF F  | GCCTAAAAATGGTCACCAAAACTATAT    | Govin et al, 2010 NAR     |
| prJG59      | qPCR-ChIP    | <i>IME2</i> ORF R  | GCCACTACACCTTGTGTCTTTGTT       | Govin et al, 2010 NAR     |
| prJG182     | qPCR-ChIP    | <i>DED1</i> F1     | AAGAGATGGAGGAACGGGAAA          | Govin et al, 2010 G&D     |
| prJG183     | qPCR-ChIP    | <i>DED1</i> R1     | CCACTTGCCACCTATCACCAC          | Govin et al, 2010 G&D     |
| prJG194     | qPCR-ChIP    | <i>GUA1</i> F      | TATGCTGAGATGTTGCCATGC          | Govin et al, 2010 G&D     |
| prJG195     | qPCR-ChIP    | <i>GUA1</i> R      | AGTCCAGCCCAACTCAGAGATC         | Govin et al, 2010 G&D     |
| prJG929     | qPCR-ChIP    | F IntV             | TAAGAGGTGATGGTGATAGGCGT        | Wyce et al, 2007 Mol Cell |
| prJG930     | qPCR-ChIP    | R IntV             | CCCTCGGGTCAAACACTACAC          | Wyce et al, 2007 Mol Cell |
